# Supplementary material for: Association of Lung Fibrotic Changes and Cardiological Dysfunction with Comorbidities in Long COVID-19 Cohort
Source: Int J Environ Res Public Health. 2023 Jan 31;20(3):2567. doi: 10.3390/ijerph20032567 (PMC9915134; doi:10.3390/ijerph20032567)
Supplement: Supplementary file 1 [file ijerph-20-02567-s001.zip › Suppl_Data_S1_Tauekelova_et_al.pdf]

## Supplemental Data S1

### Questionnaire for participants

1. Surname, Name \_\_\_\_\_
2. Telephone number \_\_\_\_\_
3. Age \_\_\_\_\_
4. Height/weight \_\_\_\_\_
5. Allergy (indicate if any) \_\_\_\_\_
6. Indicate if you have any of those complaints
  - ☐ Fatigue
  - ☐ Increased sweetness
  - ☐ Dizziness
  - ☐ Increased/decreased blood pressure
  - ☐ Palpitation
  - ☐ Pain in muscle
  - ☐ Syncope
  - ☐ Pain in epigastric region
  - ☐ Sleep disturbances
  - ☐ Other (indicate) \_\_\_\_\_
7. Chronic diseases (yes/no, if yes, indicate which)  
(*eg. Diabetes mellitus, hypertension, asthma, gastritis, etc.*)  
\_\_\_\_\_  
\_\_\_\_\_
8. Please indicate the period of coronavirus infection (day, month, duration in days)  
\_\_\_\_\_  
\_\_\_\_\_
9. Were you hospitalized during the infection period (yes/no)?  
\_\_\_\_\_  
\_\_\_\_\_  
\_\_\_\_\_
10. Did you have chest Xray or chest CT during the infection period
  - ☐ Yes
  - ☐ No
11. Please indicate any medications you take currently (if any)?  
\_\_\_\_\_  
\_\_\_\_\_  
\_\_\_\_\_  
\_\_\_\_\_  
\_\_\_\_\_

**Note.** Data was collected from 312 patients with post-COVID-19
