# Supplementary material for: Association of Lung Fibrotic Changes and Cardiological Dysfunction with Comorbidities in Long COVID-19 Cohort
Source: Int J Environ Res Public Health. 2023 Jan 31;20(3):2567. doi: 10.3390/ijerph20032567 (PMC9915134; doi:10.3390/ijerph20032567)
Supplement: Supplementary file 1 [file ijerph-20-02567-s001.zip › Suppl_Data_S2_Tauekelova_et_al.pdf]

## Supplemental Data S2

### Chalder Fatigue Scale (CFS)

Name: \_\_\_\_\_ Date: \_\_\_\_\_

Please answer ALL the questions by ticking the answer which applies to you most closely. If you have been feeling tired for a long while, then compare yourself to how you felt when you were last well. Please tick only one box per line.

|                                                       | less than usual   | no more than usual  | more than usual  | much more than usual  |
|-------------------------------------------------------|-------------------|---------------------|------------------|-----------------------|
| Do you have problems with tiredness?                  |                   |                     |                  |                       |
| Do you need to rest more?                             |                   |                     |                  |                       |
| Do you feel sleepy or drowsy?                         |                   |                     |                  |                       |
| Do you have problems starting things?                 |                   |                     |                  |                       |
| Do you lack energy?                                   |                   |                     |                  |                       |
| Do you have less strength in your muscles?            |                   |                     |                  |                       |
| Do you feel weak?                                     |                   |                     |                  |                       |
| Do you have difficulties concentrating?               |                   |                     |                  |                       |
| Do you make slips of the tongue when speaking?        |                   |                     |                  |                       |
| Do you find it more difficult to find the right word? |                   |                     |                  |                       |
|                                                       | better than usual | no worse than usual | worse than usual | much worse than usual |
| How is your memory?                                   |                   |                     |                  |                       |

**Note.** Data was collected from 312 patients with post-COVID-19
