# Supplementary material for: Association of Lung Fibrotic Changes and Cardiological Dysfunction with Comorbidities in Long COVID-19 Cohort
Source: Int J Environ Res Public Health. 2023 Jan 31;20(3):2567. doi: 10.3390/ijerph20032567 (PMC9915134; doi:10.3390/ijerph20032567)
Supplement: Supplementary file 1 [file ijerph-20-02567-s001.zip › Supplemental_Tables1-2_Tauekelova_et_al.pdf]

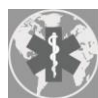

**Supplemental Table S1.** Comparison of clinical manifestations amongst participants with and without diabetes

|                        | <b>Total<br/>(n=312)</b> | <b>Diabetes<br/>(n=39)</b> | <b>No Diabetes<br/>(n=273)</b> | <b>p-value</b> |
|------------------------|--------------------------|----------------------------|--------------------------------|----------------|
| Age, years             | 54 (42.5;60)             | 60 (53;65.5)               | 53 (41;59)                     | < 0.001        |
| BMI, kg/m <sup>2</sup> | 26.9 (23.4;31.1)         | 30.1 (26.7;34.2)           | 26.3 (23.1;30.8)               | 0.001          |
| DD                     | 0.23 (0.19;0.36)         | 0.32 (0.2;0.51)            | 0.22 (0.19;0.35)               | 0.001          |
| NT-proBNP              | 0.043 (0.021;0.082)      | 0.064 (0.0247;0.127)       | 0.041 (0.021;0.078)            | 0.02           |
| CRP                    | 0.19 (0.09;0.41)         | 0.35 (0.165;0.73)          | 0.18 (0.08;0.38)               | <0.001         |
| Neutrophils            | 3.105 (2.49;3.895)       | 3.45 (3;4.36)              | 3 (2.45;3.83)                  | 0.01           |
| Fasting glucose        | 92.68 (85.04;103.07)     | 136 (114;220)              | 90.8 (84;99.3)                 | <0.001         |
| HbA1c                  | 5.3 (5.075;5.7)          | 7 (6.15;9.25)              | 5.3 (5;5.6)                    | <0.001         |

**Supplemental Table S2.** Comparison of clinical manifestations amongst participants with and without hypertension

|                        | <b>Total<br/>(n=312)</b> | <b>Hypertension<br/>(n=158)</b> | <b>No Hypertension<br/>(n=154)</b> | <b>p-value</b> |
|------------------------|--------------------------|---------------------------------|------------------------------------|----------------|
| Age, years             | 54 (42.5;60)             | 58 (51.2;63)                    | 46.5 (36;57)                       | <0.001         |
| BMI, kg/m <sup>2</sup> | 26.9 (23.4;31.1)         | 29 (24.7;33.2)                  | 25.0 (22.7;28.4)                   | <0.001         |
| Ferritin               | 82.9 (35.27;155.85)      | 100 (58.5;177)                  | 61.8 (20.2;132)                    | <0.001         |
| Fibrinogen             | 3.490 (2.995;4.04)       | 3.67 (3.08;4.18)                | 3.34 (2.9;3.9)                     | 0.001          |
| HGB                    | 134 (126;143)            | 136 (128;144)                   | 131 (124;142)                      | 0.01           |
| WBC                    | 5.927 (4.85;6.665)       | 5.96 (5.06;6.98)                | 5.49 (4.76;6.46)                   | 0.01           |
| DD                     | 0.23 (0.19;0.36)         | 0.27 (0.19;0.438)               | 0.195 (0.19;0.3)                   | <0.001         |
| NT-proBNP              | 0.043 (0.021;0.082)      | 0.0534<br>(0.0232;0.104)        | 0.0375<br>(0.0185;0.0659)          | 0.001          |
| CRP                    | 0.19 (0.09;0.41)         | 0.242 (0.117;0.64)              | 0.14 (0.06;0.29)                   | <0.001         |
| Neutrophils            | 3.105 (2.49;3.895)       | 3.31 (2.55;4.00)                | 2.92 (2.39;3.69)                   | 0.008          |
| Fasting glucose        | 92.68 (85.04;103.07)     | 95.8 (88.6;113)                 | 89.1 (82.6;97.5)                   | <0.001         |
| HbA1c                  | 5.3 (5.075;5.7)          | 5.6 (5.2;6.2)                   | 5.2 (5;5.49)                       | <0.001         |
